# Supplementary material for: Active Transport and Diffusion Barriers Restrict Joubert Syndrome-Associated ARL13B/ARL-13 to an Inv-like Ciliary Membrane Subdomain
Source: PubMed Central journal article supplement (PMC3854969; doi:10.1371/journal.pgen.1003977), 2013-12-05

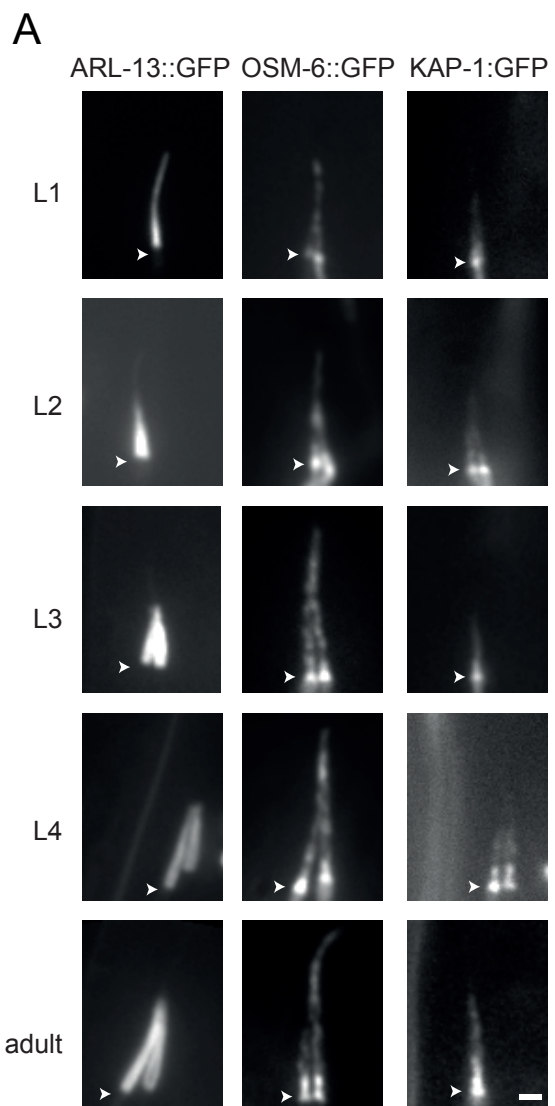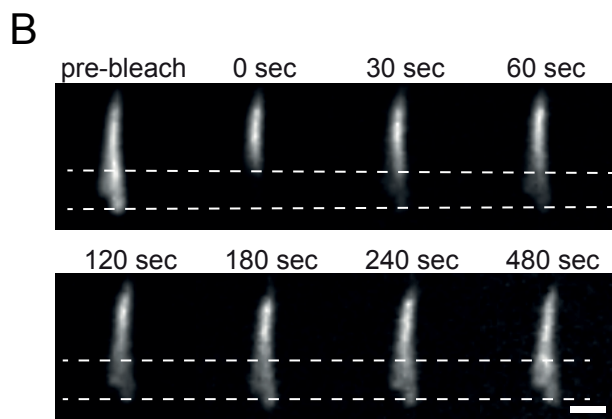

Supplement: pgen.1003977.s001.pdf [file pgen.1003977.s001.pdf]
